# Supplementary material for: Cardanol and Eugenol Based Flame Retardant Epoxy Monomers for Thermostable Networks
Source: PubMed Central journal article supplement (PMC6540237; doi:10.3390/molecules24091818), 2019-05-10
Supplement: molecules-24-01818-s001.pdf [file molecules-24-01818-s001.pdf]

# CARDANOL AND EUGENOL BASED FLAME RETARDANT EPOXY MONOMERS FOR THERMOSTABLE NETWORKS

Yvan Ecochard,<sup>a†</sup> Mélanie Decostanzi,<sup>a†</sup> Claire Negrell,<sup>a</sup> Rodolphe Sonnier,<sup>b</sup> Sylvain Caillol<sup>a\*</sup>

<sup>a</sup> ICGM, UMR 5253 – CNRS, Université de Montpellier, ENSCM, 240 Avenue Emile Jeanbrau  
34296 Montpellier, France

<sup>b</sup> C2MA, IMT – Mines Alès, 6, avenue de Clavières, 30100 Alès, France

<sup>†</sup> all authors have equally contributed

\*Corresponding author: Sylvain Caillol, Email: sylvain.caillol@enscm.fr

## Content

|     |                    |    |
|-----|--------------------|----|
| I.  | NMR analyses.....  | 2  |
| 1.  | TEP .....          | 2  |
| 2.  | TEEP .....         | 3  |
| 3.  | DEP.....           | 4  |
| 4.  | DEEP.....          | 5  |
| 5.  | DEP-Ph.....        | 6  |
| 6.  | DEEP-Ph.....       | 7  |
| 7.  | TCP.....           | 8  |
| 8.  | TECP.....          | 9  |
| II. | DSC analyses ..... | 10 |

## I. NMR analyses

### 1. TEP

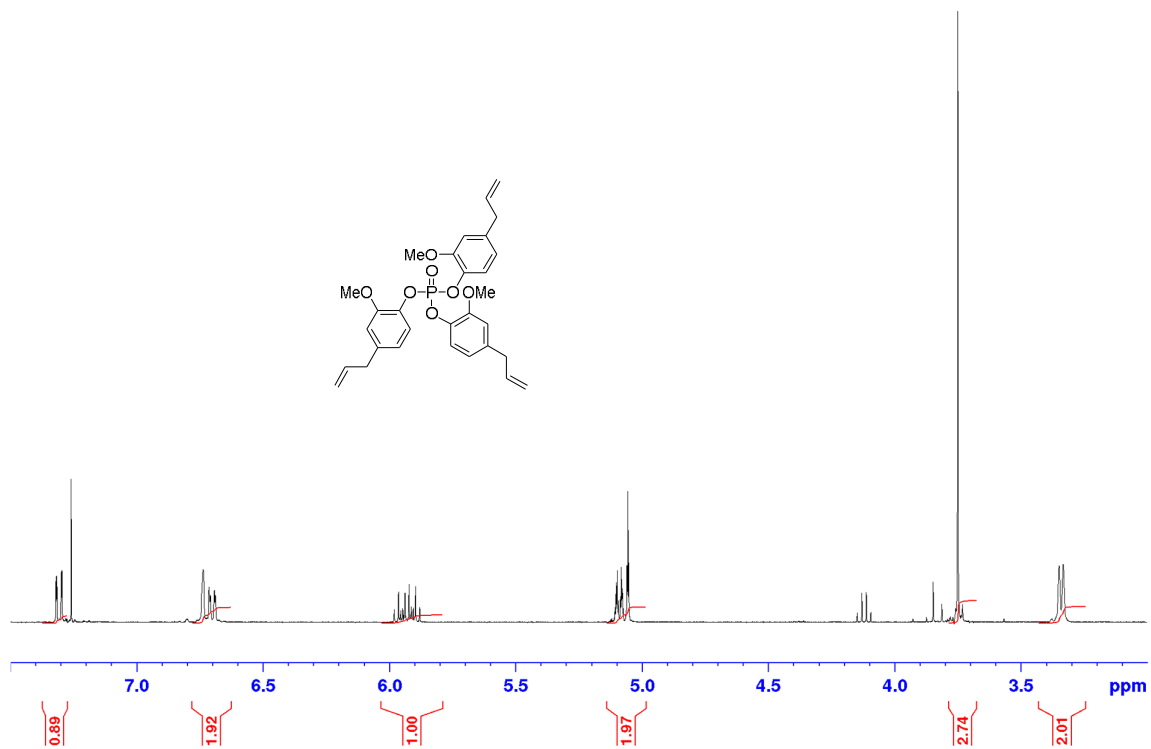

Figure S1: <sup>1</sup>H NMR of TEP.

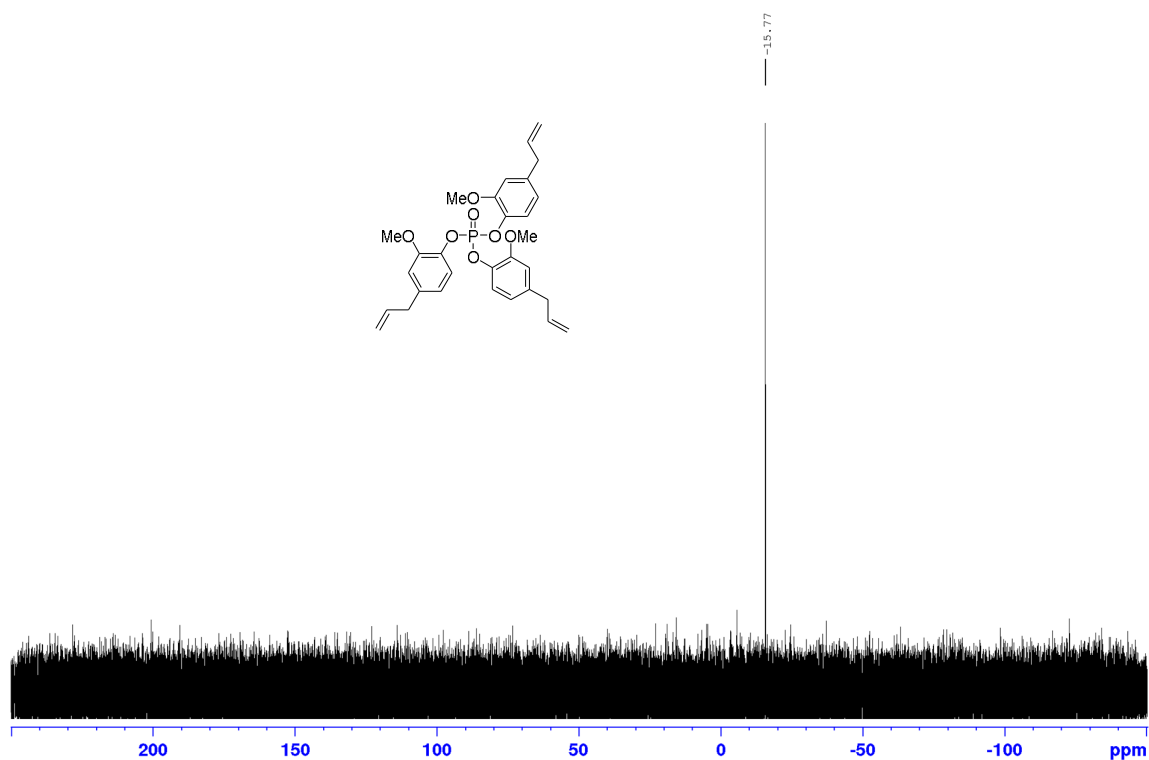

Figure S2:  $^{31}\text{P}$  NMR of TEP.

## 2. TEEP

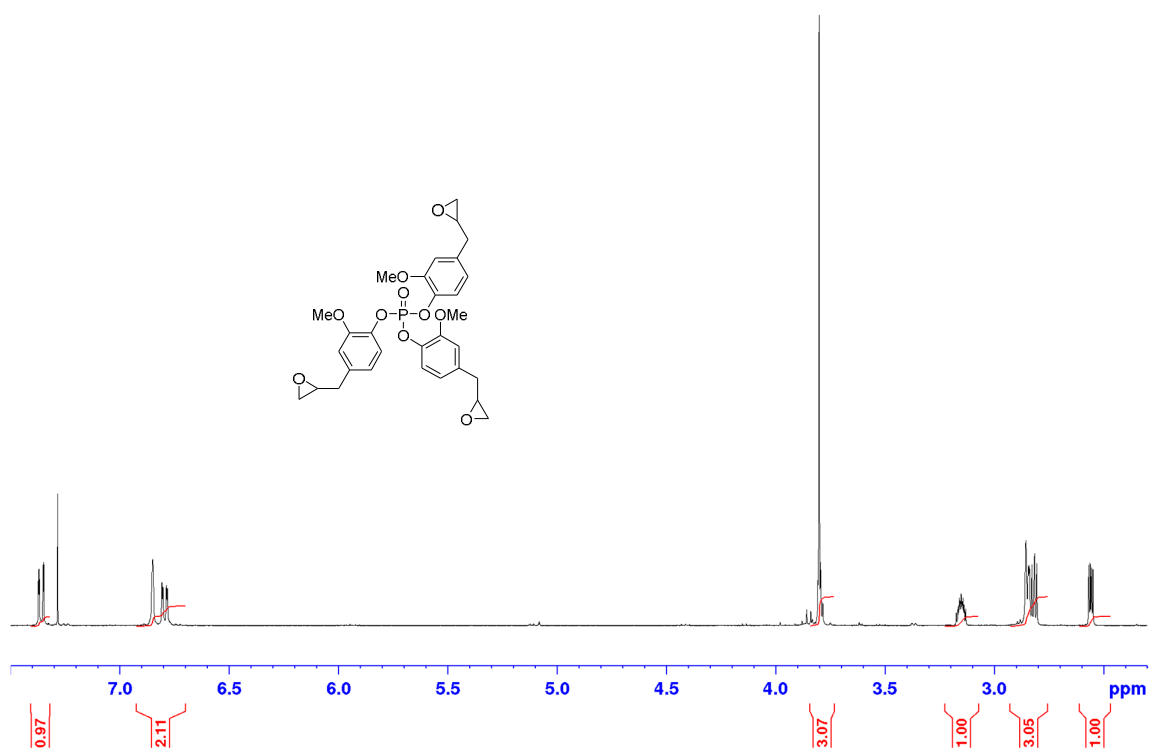

Figure S3:  $^1\text{H}$  NMR of TEEP.

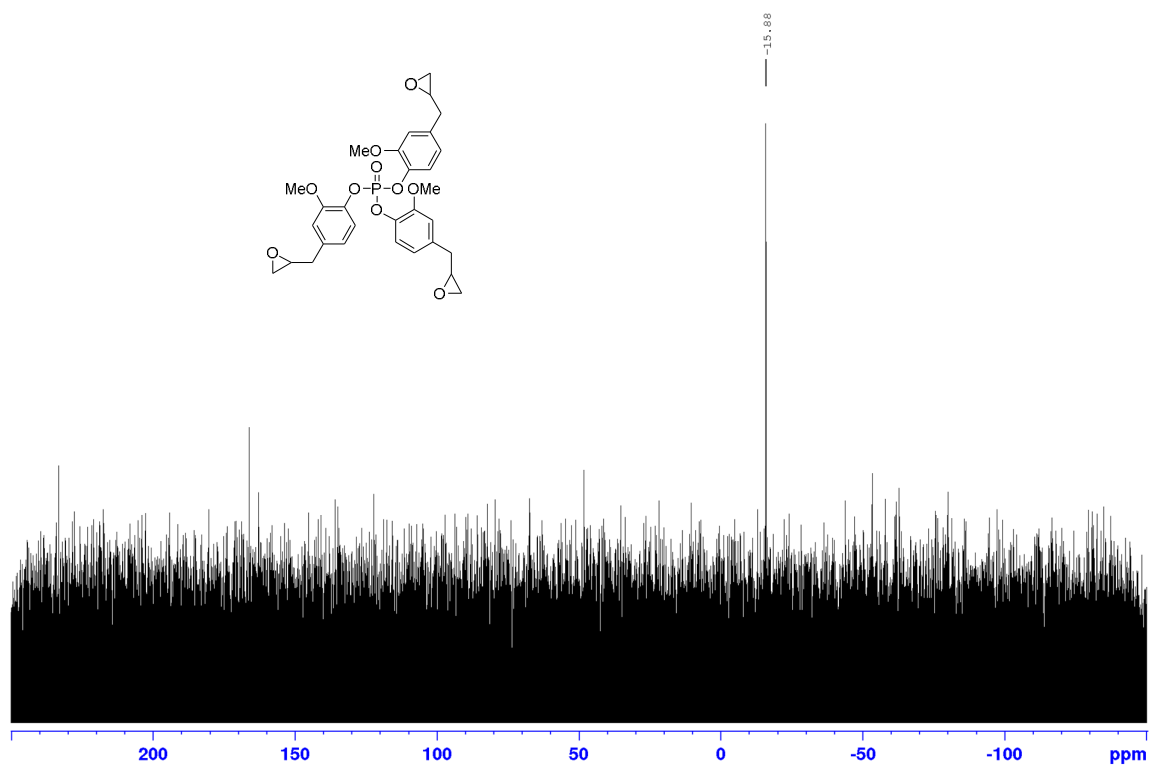

Figure S4:  $^{31}\text{P}$  NMR of TEEP.

### 3. DEP

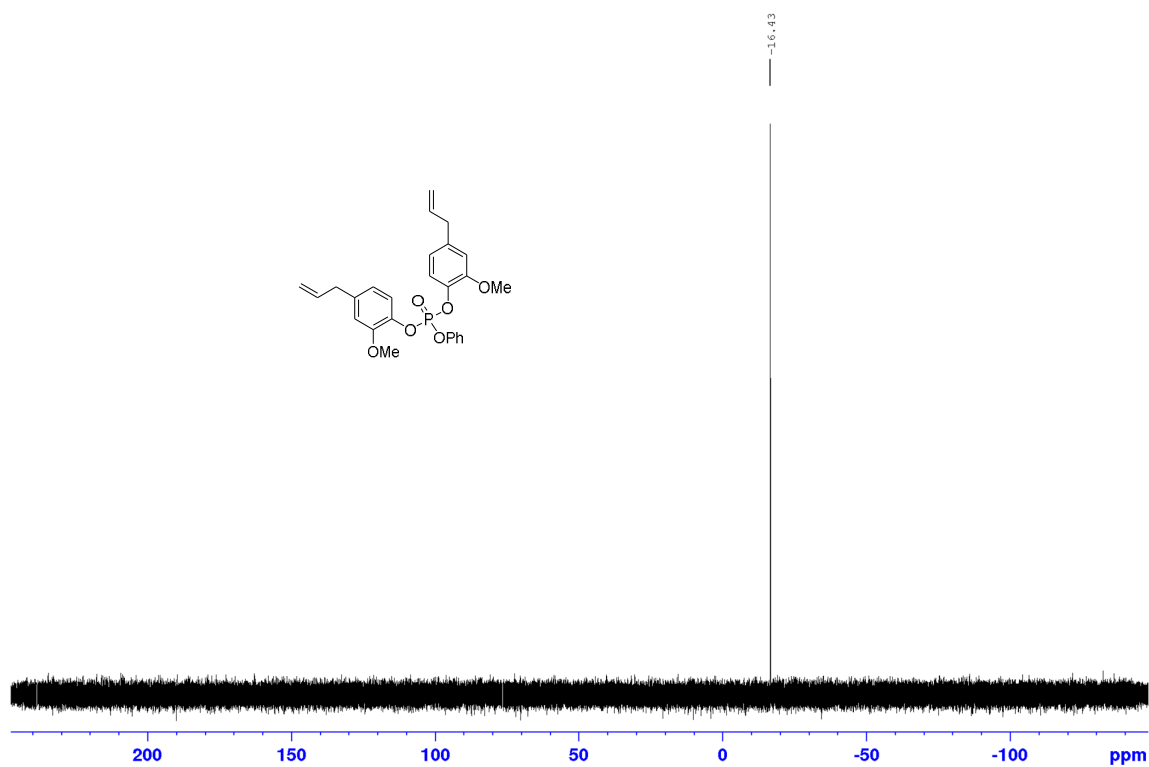

Figure S5:  $^{31}\text{P}$  NMR of DEP.

4. DEEP

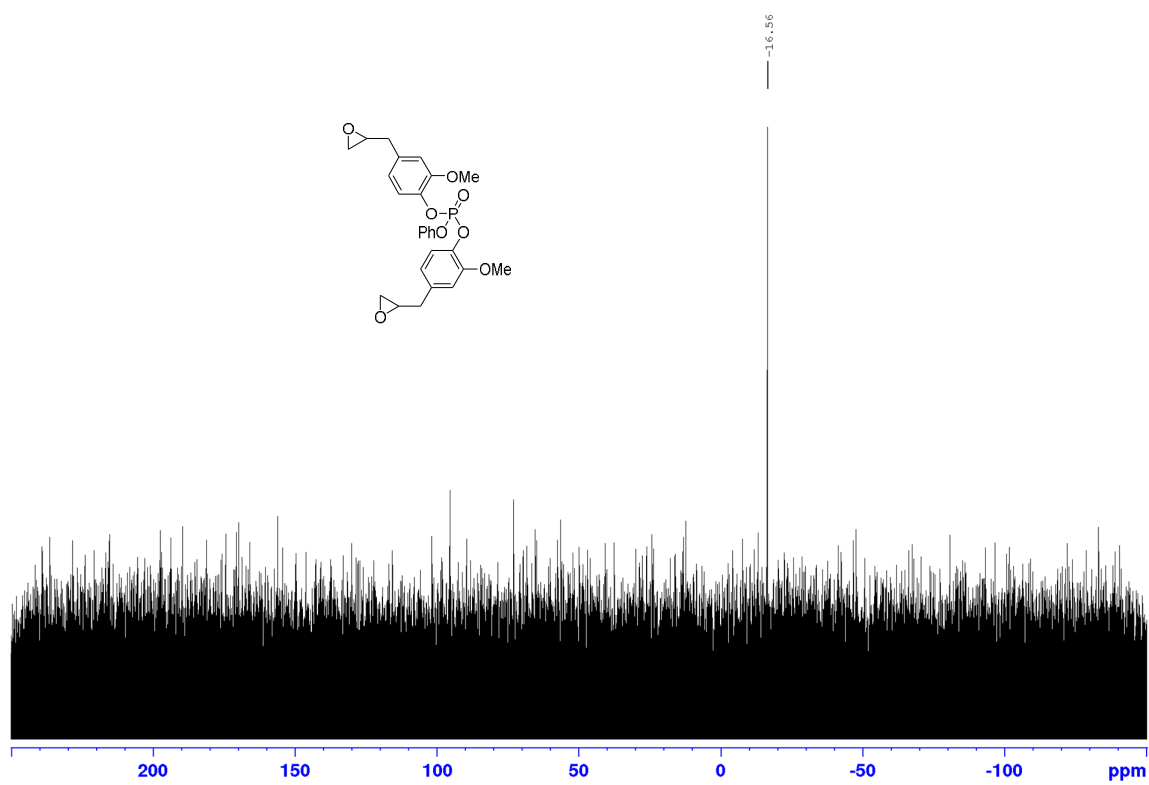

Figure S6:  $^{31}\text{P}$  NMR of DEEP.

5. DEP-Ph

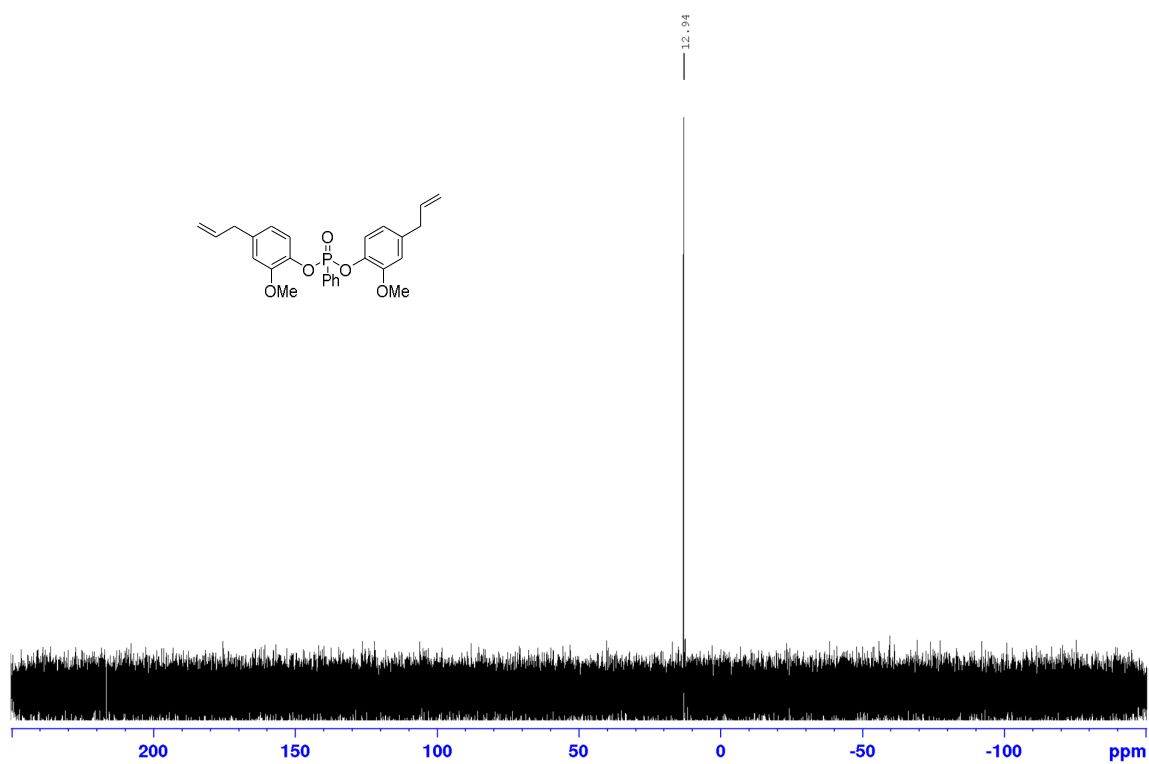

Figure S7:  $^{31}\text{P}$  NMR of DEP-Ph.

6. DEEP-Ph

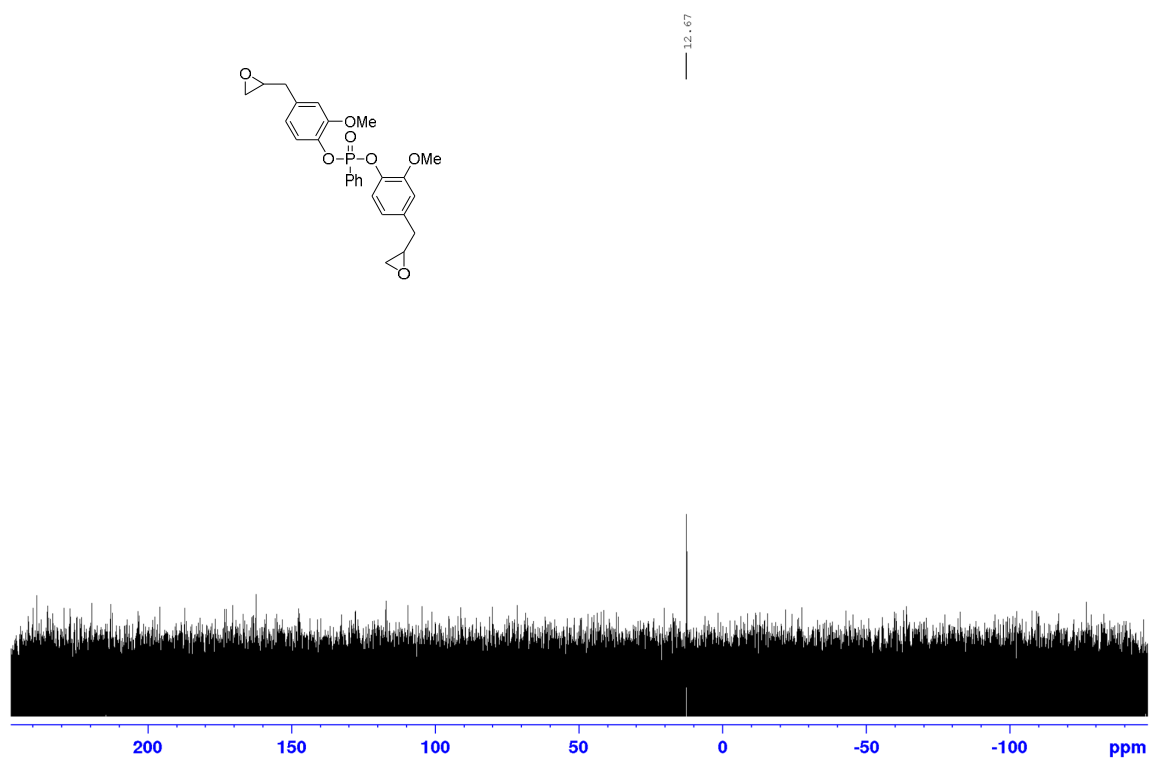

Figure S8:  $^{31}\text{P}$  NMR of DEEP-Ph.

7. TCP

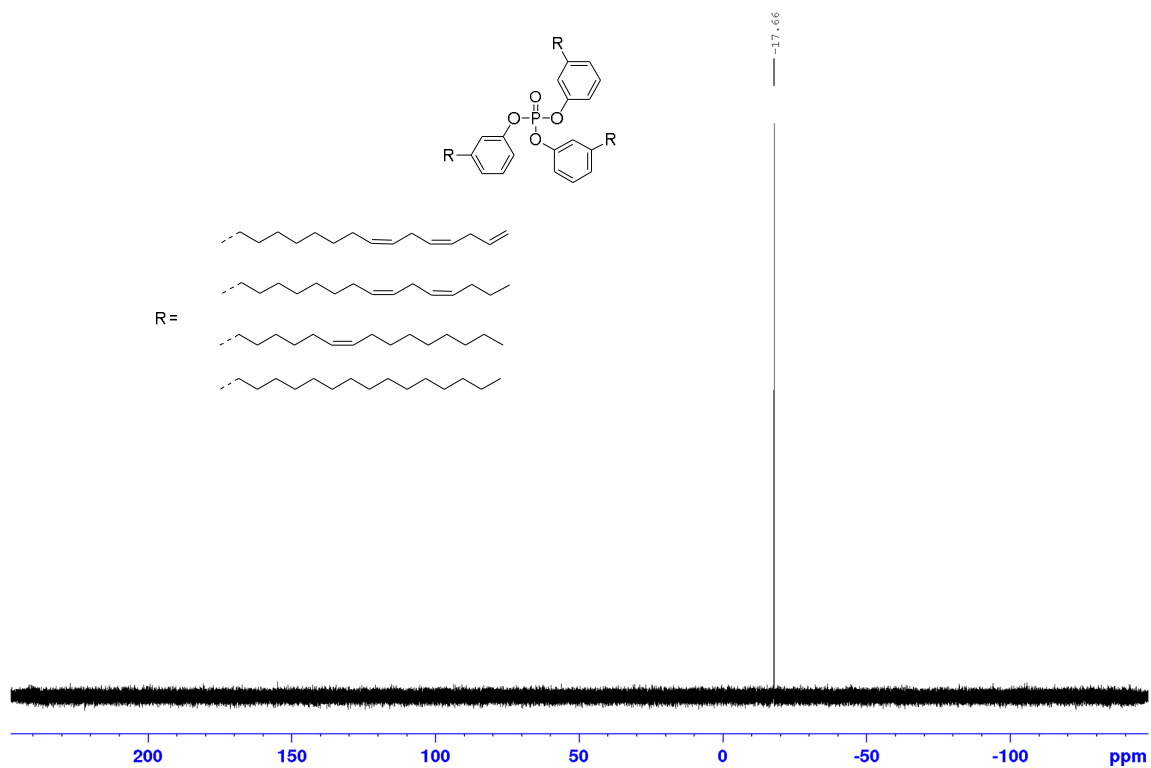

Figure S9:  $^{31}\text{P}$  NMR of TCP.



8. TECP

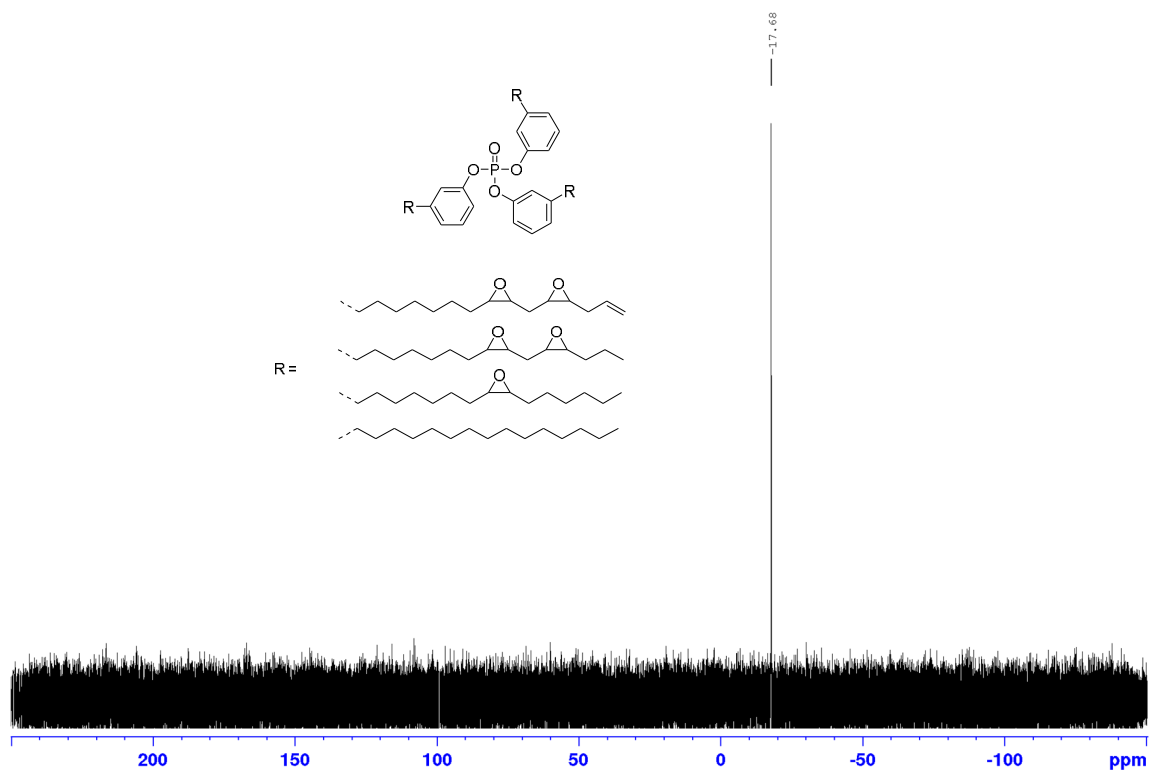

Figure S10:  $^{31}\text{P}$  NMR of TECP.

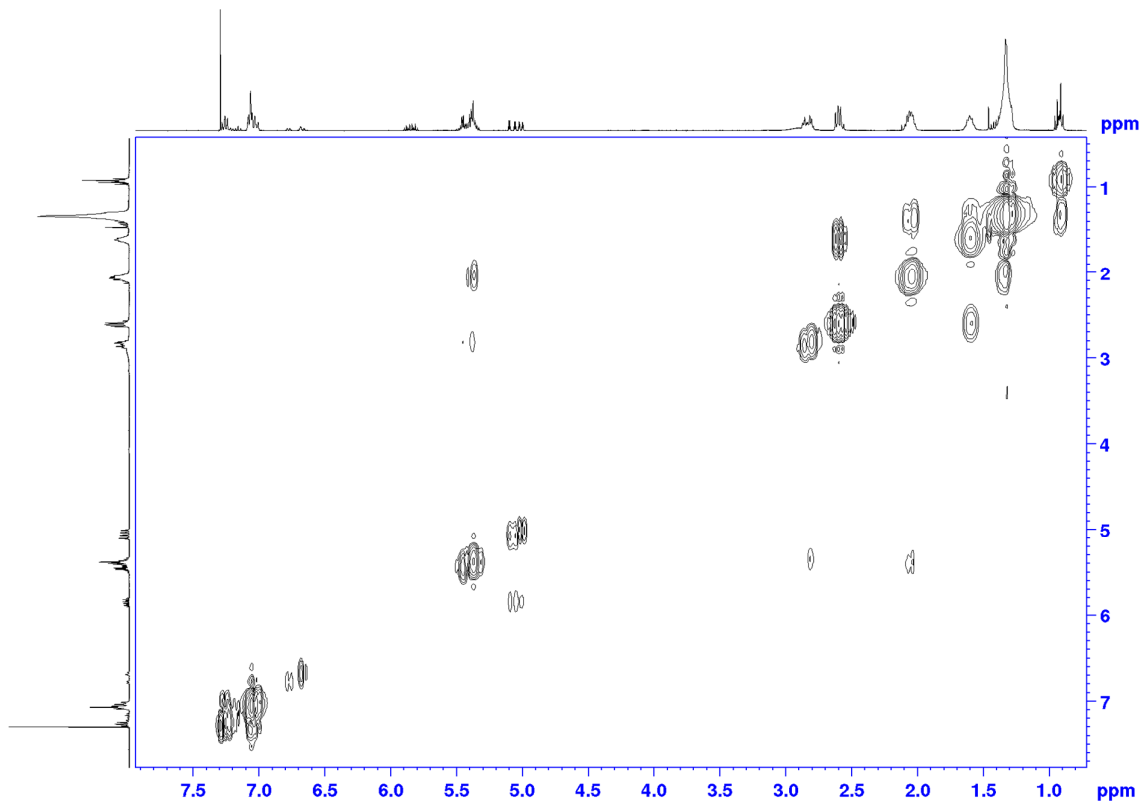

Figure S11: COSY  $^1\text{H}$ - $^1\text{H}$  of TECP.

## II. DSC analyses

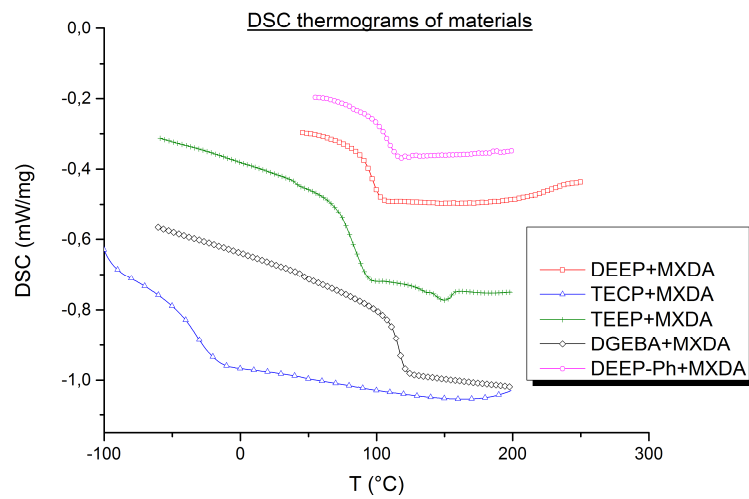

Figure S12: DSC analyses of the materials.
